# Supplementary material
Source: PubMed Central journal article supplement (PMC5625038)
Supplement: 10.1074_M117.791756_jbc.M117.791756-1.pdf [file 10.1074_M117.791756_jbc.M117.791756-1.pdf]

**The crystal structure of full-length Sizzled from *Xenopus laevis* yields insights into Wnt-antagonistic function of secreted frizzled-related proteins**

Qixin Bu <sup>a, b, 1</sup>, Zhiqiang Li <sup>a, b, 1</sup>, Junying Zhang <sup>a, b, c</sup>, Fei Xu <sup>a, b</sup>, Jianmei Liu <sup>a, b</sup>, Heli Liu <sup>a, b, \*</sup>

<sup>a</sup> State Key Laboratory of Natural and Biomimetic Drugs & <sup>b</sup> Department of Molecular and Cellular Pharmacology, School of Pharmaceutical Sciences, Peking University Health Science Center, 38 Xueyuan Road, Haidian District, Beijing 100191, China; <sup>c</sup> Current address: Rehabilitation hospital, National Research Center for Rehabilitation Technical Aids, Beijing 100176, China.

<sup>1</sup>These authors contributed equally to this work.

\*Correspondence email: liuheli@hsc.pku.edu.cn

Table-S1 Data collection and refinement statistics for Sizzled crystals

|                                                                    | crystal for phasing              | crystal for refinement           |
|--------------------------------------------------------------------|----------------------------------|----------------------------------|
| <b>Data collection</b>                                             |                                  |                                  |
| X-ray source                                                       | MicroMax-003                     | BL17U                            |
| Detector                                                           | Saturn 944                       | Quantum 315                      |
| Wavelength (Å)                                                     | 1.54178                          | 0.97915                          |
| Crystal-to-detector distance (mm)                                  | 70                               | 300                              |
| Oscillation range (°)                                              | 360                              | 180                              |
| Oscillation width per image (°)                                    | 0.3                              | 1                                |
| Space group                                                        | P4 <sub>3</sub> 2 <sub>1</sub> 2 | P4 <sub>3</sub> 2 <sub>1</sub> 2 |
| Unit cell dimensions: a, b, c (Å)                                  | 70.218, 70.218, 132.404          | 70.131, 70.131, 132.584          |
| Resolution range (Å) <sup>§</sup>                                  | 50-2.60 (2.64-2.60)              | 50-2.08 (2.12-2.08)              |
| Unique reflections                                                 | 10669                            | 20594                            |
| Completeness (%)                                                   | 98.6 (76.0)                      | 99.3 (99.8)                      |
| <i>I</i> /σ( <i>I</i> )                                            | 77.9 (12.4)                      | 30.1 (3.1)                       |
| Redundancy                                                         | 25.6 (16.0)                      | 6.0 (6.1)                        |
| <i>R</i> <sub>merge</sub> (%) <sup>a</sup>                         | 5.1 (24.7)                       | 7.1 (95.6)                       |
| <i>R</i> <sub>meas</sub> (%) <sup>a</sup>                          | 5.2 (25.5)                       | 7.7 (100.0)                      |
| <i>R</i> <sub>pim</sub> (%) <sup>a</sup>                           | 1.0 (6.1)                        | 3.2 (42.3)                       |
| <sup>a</sup> CC <sub>1/2</sub>                                     |                                  | (0.824)                          |
| <sup>a</sup> CC*                                                   |                                  | (0.950)                          |
| <b>SAD phasing</b>                                                 |                                  |                                  |
| Resolution range (Å)                                               | 50-2.9                           |                                  |
| <i>R</i> <sub>anomalous</sub> (%)                                  | 3.5                              |                                  |
| Number of sulfur atoms                                             | 3                                |                                  |
| Figure of merit                                                    | 0.41                             |                                  |
| <b>Refinement</b>                                                  |                                  |                                  |
| Resolution range (Å)                                               |                                  | 19.86-2.08 (2.19-2.08)           |
| <i>R</i> <sub>work</sub> <sup>b</sup>                              |                                  | 21.3 (27.7)                      |
| <i>R</i> <sub>free</sub> <sup>b</sup>                              |                                  | 23.0 (31.9)                      |
| Average <i>B</i> -factor for protein and solvent (Å <sup>2</sup> ) |                                  | 52.0, 48.4                       |
| r.m.s.d. bond length (Å)                                           |                                  | 0.002                            |
| r.m.s.d. bond angle (°)                                            |                                  | 0.457                            |
| Ramachandran (%; favored, allowed, generally allowed, disallowed)  |                                  | 93.2, 6.8, 0, 0                  |

<sup>§</sup>Values in parenthesis are for the highest resolution shell.

<sup>a</sup>  $R_{\text{merge}} = \sum_{hkl} |I - \langle I \rangle| / \sum_{hkl} I$ , where *I* is the intensity of unique reflection *hkl*, and  $\langle I \rangle$  is the average over symmetry-related observations of unique reflection *hkl*. Please see the references (67-69) for the definitions of *R*<sub>pim</sub>, *R*<sub>means</sub>, CC<sub>1/2</sub> and CC\*.

<sup>b</sup>  $R_{\text{work}} = \sum |F_o - F_c| / \sum F_o$ , where *F*<sub>o</sub> and *F*<sub>c</sub> are the observed and calculated structure factors, respectively. *R*<sub>free</sub> was calculated using 5% of the reflections set aside from refinement.

Table S2 Secondary structure prediction of human sFRPs

| sFRPs   | sequence                 | Predicted/determined              |
|---------|--------------------------|-----------------------------------|
| Sizzled | PYDTRTMIEQWLLINENCAQKLI  | Helices $\alpha 6$ and $\alpha 7$ |
| sFRP1   | KKKDLKKLVLYLKNAGDCPCHQL  | helix                             |
| sFRP2   | SERDLKKSVLWLKDSLQCTCEEM  | helix                             |
| sFRP3   | SLVNIPRDTVNLYTSSGCLCPPL  | beta-strand                       |
| sFRP4   | SSPIPRVQVPLITNSSCQCPHIL  | beta-strand                       |
| sFRP5   | KRKDTKRLVLHMKNGAGCPCPQLD | helix                             |

Fig. S1. (A) Overview of the anomalous difference Fourier map (contoured at  $3.0 \sigma$ ) for heavy atoms in an asymmetric unit. One Sizzled molecule was observed in the asymmetric unit (CRD domain, cyan; NTR domain, salmon). Eight pairs of disulfide bonds are indicated using yellow sticks. Two sulfates are also represented using sticks. Purple spheres represent chlorides. (B) Close-up view of the squared area of (A). (C) Stereoview of the simulated annealing omit map (grey mesh) for the NTR domain (indicated in cartoons).

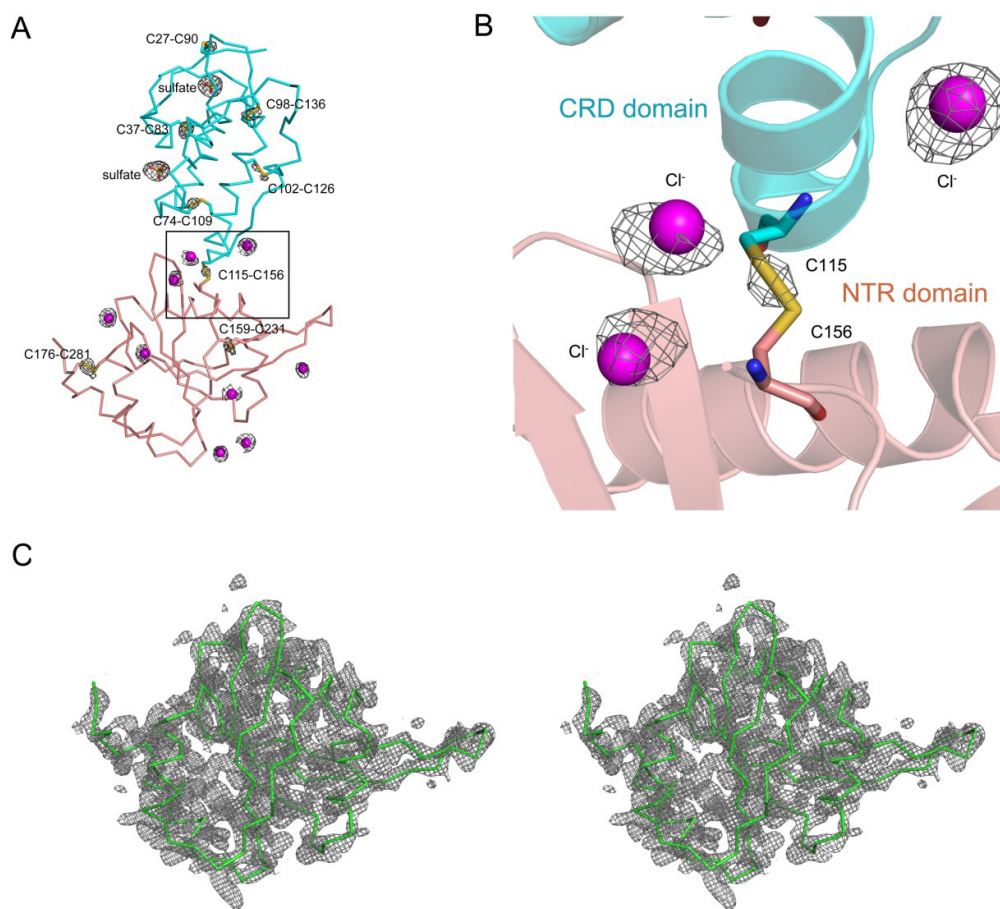

Fig. S1

Fig. S2. Sequence-based rooted phylogenetic analysis of *Xenopus laevis* Sizzled and human sFRPs. The sequence alignment was made by ClusterW and the phylogenetic tree was produced using TreeView.

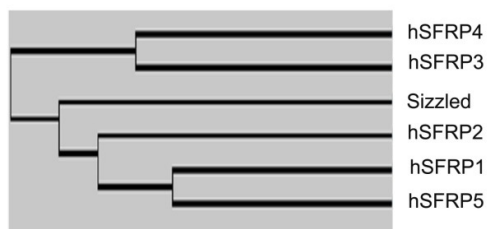

Fig. S3. (A) Side view of mouse sFRP3 CRD dimer (PDB code 1IJX) in ribbon model with two protomers in cyan and green, respectively. (B) Top view of the mouse sFRP3 CRD dimer with interfacial hydrophobic residues shown in stick representation.

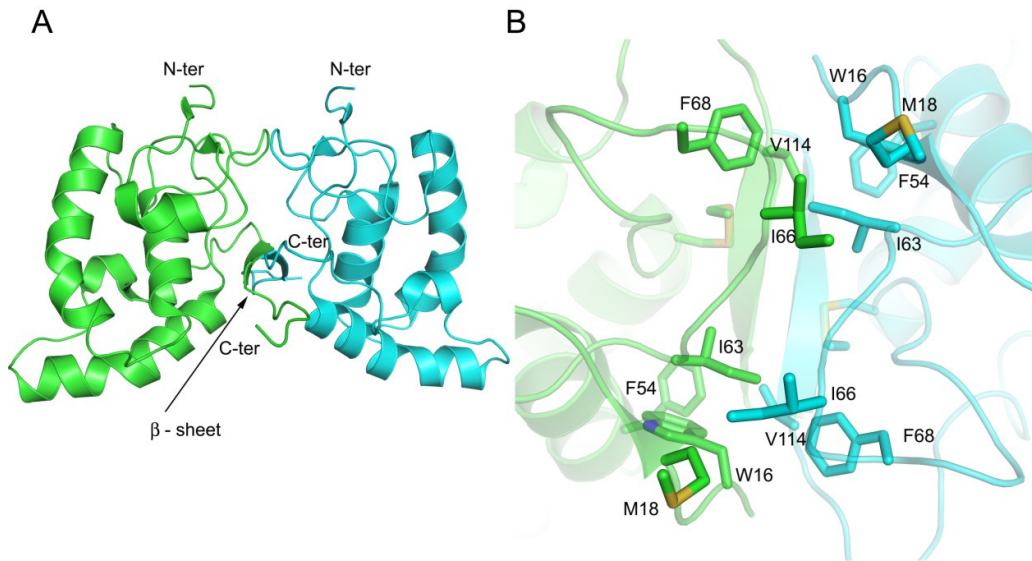

Fig. S3

Fig. S4. Supposed mechanism of biphasic modulation of Wnt signaling by sFRPs. (A) sFRPs (yellow) serve a carrier to carry free Wnt (green; with the PAM group in red) from a distant area to a target cell. The Wnt-sFRP complex diffuses to the local area to the target cell and binds to heparin or client proteins around the cells through the positively charged region (blue) on the bottom surface of the sFRP. The Wnt dissociated from the Wnt-sFRP complex binds to the CRD domain of Frizzled (purple) on the target cell for activating Wnt signaling. (B) sFRPs (yellow) diffuse to the local area of a target cell and serve a decoy to trap excess Wnt for inhibiting Wnt signaling. The diffusion of sFRPs depends on the existence of heparin or client proteins around the target cell.

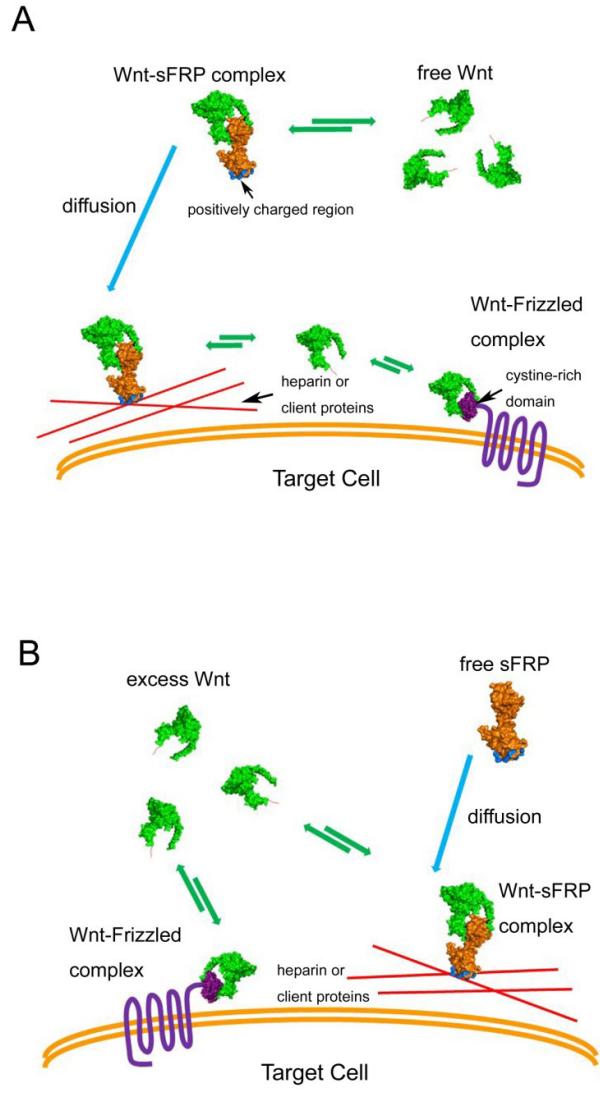

Fig. S4
